# Supplementary material for: Depressive symptoms and other risk factors predicting suicide in middle-aged men: a prospective cohort study among Korean Vietnam War veterans
Source: PubMed Central journal article supplement (PMC4493683; doi:10.7717/peerj.1071), 2015-07-02
Supplement: peerj-03-1071-s003.pdf [file peerj-03-1071-s003.pdf]

**Table S3. Adjusted hazard ratios of suicides by risk factors according to follow-up period<sup>a</sup>**

| Risk factors                            | Categories               | From 2001 to 2004            |         |                   | From 2005 to 2008            |         |                 |
|-----------------------------------------|--------------------------|------------------------------|---------|-------------------|------------------------------|---------|-----------------|
|                                         |                          | n=10,238                     |         |                   | n=9,877                      |         |                 |
|                                         |                          | No. of suicides <sup>b</sup> | p-value | HR (95% CI)       | No. of suicides <sup>b</sup> | p-value | HR (95% CI)     |
| Age at enrollment                       | One year increase in age | 16                           | 0.23    | 0.9 (0.7-1.1)     | 25                           | 0.65    | 1.0 (0.8-1.1)   |
| Smoking status                          | Never smoker             | 2                            |         | 1.0 [Reference]   | 7                            |         | 1.0 [Reference] |
|                                         | Past smoker              | 4                            | 0.6     | 1.6 (0.3-8.7)     | 3                            | 0.23    | 0.4 (0.1-1.7)   |
|                                         | Current smoker           | 10                           | 0.3     | 2.3 (0.5-10.5)    | 15                           | 0.92    | 1.0 (0.4-2.7)   |
|                                         | p for trend <sup>c</sup> | 16                           | 0.27    | 1.5 (0.7-3)       | 25                           | 0.79    | 1.1 (0.6-1.8)   |
| Drinking status                         | Never drinker            | 0                            |         | 1.0 [Reference]   | 1                            |         | 1.0 [Reference] |
|                                         | Past drinker             | 8                            | 0.13    | 26.3 (0.4-1787.6) | 8                            | 0.2     | 5.7 (0.4-82.1)  |
|                                         | Current drinker          | 8                            | 0.22    | 14.1 (0.2-944.3)  | 15                           | 0.24    | 4.9 (0.3-69.2)  |
|                                         | p for trend <sup>c</sup> | 16                           | 0.53    | 1.3 (0.6-2.7)     | 25                           | 0.37    | 1.3 (0.7-2.6)   |
| Body mass index<br>(kg/m <sup>2</sup> ) | Below 18.5               | 0                            | 0.99    | 0.0               | 2                            | 0.47    | 1.8 (0.4-8.1)   |
|                                         | 18.5-22.9                | 11                           |         | 1.0 [Reference]   | 11                           |         | 1.0 [Reference] |
|                                         | 23.0-24.9                | 4                            | 0.48    | 0.7 (0.2-2.1)     | 6                            | 0.9     | 0.9 (0.3-2.6)   |
|                                         | 25 or above              | 1                            | 0.1     | 0.2 (0-1.4)       | 6                            | 0.99    | 1.0 (0.4-2.7)   |
|                                         | p for trend <sup>c</sup> | 16                           | 0.22    | 0.7 (0.4-1.3)     | 25                           | 0.73    | 0.9 (0.6-1.5)   |
| Self-rated health                       | Very good or good        | 0                            |         | 0.0               | 1                            | 0.77    | 1.4 (0.1-14.6)  |
|                                         | Fair                     | 4                            | 0.32    | 2.1 (0.5-9.4)     | 5                            | 0.83    | 0.9 (0.3-2.8)   |
|                                         | Poor                     | 5                            |         | 1.0 [Reference]   | 11                           |         | 1.0 [Reference] |
|                                         | Very poor                | 7                            | 0.08    | 3.0 (0.9-10.3)    | 8                            | 0.13    | 2.1 (0.8-5.7)   |
|                                         | p for trend <sup>c</sup> | 16                           | 0.33    | 1.5 (0.7-3.5)     | 25                           | 0.26    | 1.5 (0.8-2.8)   |

| Risk factors                                         | Categories                 | From 2001 to 2004            |         |                 | From 2005 to 2008            |         |                 |
|------------------------------------------------------|----------------------------|------------------------------|---------|-----------------|------------------------------|---------|-----------------|
|                                                      |                            | No. of suicides <sup>b</sup> | p-value | HR (95% CI)     | No. of suicides <sup>b</sup> | p-value | HR (95% CI)     |
|                                                      |                            | n=10,238                     |         |                 | n=9,877                      |         |                 |
| Marital status                                       | Living with spouse         | 14                           |         | 1.0 [Reference] | 21                           |         | 1.0 [Reference] |
|                                                      | Living without spouse      | 2                            | 0.61    | 0.7 (0.1-3.1)   | 4                            | 0.45    | 1.5 (0.5-4.7)   |
| Educational status                                   | Elementary school or below | 4                            | 0.82    | 1.2 (0.3-5.0)   | 12                           | 0.02    | 3.5 (1.2-10.2)  |
|                                                      | Middle school              | 8                            | 0.15    | 2.5 (0.7-8.4)   | 7                            | 0.36    | 1.8 (0.5-5.8)   |
|                                                      | High school or above       | 4                            |         | 1.0 [Reference] | 6                            |         | 1.0 [Reference] |
|                                                      | p for trend <sup>c</sup>   | 16                           | 0.56    | 0.8 (0.5-1.5)   | 25                           | 0.02    | 0.6 (0.3-0.9)   |
| Household income per month (Korean Won) <sup>d</sup> | Below 1 000 000            | 10                           | 0.59    | 1.9 (0.2-17.6)  | 11                           | 0.97    | 1.0 (0.2-5.1)   |
|                                                      | 1 000 000-1 990 000        | 5                            | 0.89    | 1.2 (0.1-11.2)  | 11                           | 0.81    | 1.2 (0.2-5.9)   |
|                                                      | 2 000 000 or more          | 1                            |         | 1.0 [Reference] | 3                            |         | 1.0 [Reference] |
|                                                      | p for trend <sup>c</sup>   | 16                           | 0.45    | 0.7 (0.3-1.8)   | 25                           | 0.81    | 1.1 (0.5-2.3)   |
| Participant group                                    | Health exam group          | 3                            | 0.69    | 1.3 (0.4-4.6)   | 4                            | 0.84    | 0.9 (0.3-2.6)   |
|                                                      | Survey-only group          | 13                           |         | 1.0 [Reference] | 21                           |         | 1.0 [Reference] |

BDI, Beck Depression Inventory; CI, confidence interval; HR, hazard ratio.

a. Hazard ratios were calculated using a Cox proportional hazards model over multiple imputed data, after adjustment for age at enrollment, smoking status, drinking status, body mass index, self-rated health, marital status, educational status, household monthly income, participant group and depressive symptoms (5 categories based on quartiles and the last decile of the total BDI score).

b. Sum of the number of suicides by each risk factor may not equal the total suicides due to rounding of averages over multiple imputed data.

c. Categories of risk factors were analyzed as ordinal variables.

d. 1300 Korean Won was about one US dollar as of June, 2001
