# Supplementary material for: Depressive symptoms and other risk factors predicting suicide in middle-aged men: a prospective cohort study among Korean Vietnam War veterans
Source: PubMed Central journal article supplement (PMC4493683; doi:10.7717/peerj.1071), 2015-07-02
Supplement: peerj-03-1071-s004.pdf [file peerj-03-1071-s004.pdf]

**Table S4. Diagnostic characteristics of Beck Depression Inventory for suicide by follow-up period in Korean middle-aged men. (Sensitivity analysis)**

| Follow-up period | Characteristics          | Cut-off of 30 or above <sup>a</sup> | Unbinned Total Score       |
|------------------|--------------------------|-------------------------------------|----------------------------|
|                  |                          | Rate (95% CI) <sup>b</sup>          | Rate (95% CI) <sup>b</sup> |
| From 2001-2008   | Sensitivity <sup>c</sup> | 67 (52-79)                          |                            |
|                  | Specificity <sup>d</sup> | 71 (70-72)                          |                            |
|                  | AUC <sup>e</sup>         | 0.69 (0.61-0.76)                    | 0.71 (0.63-0.80)           |
| From 2001-2004   | Sensitivity <sup>c</sup> | 75 (50-90)                          |                            |
|                  | Specificity <sup>d</sup> | 71 (70-71)                          |                            |
|                  | AUC <sup>e</sup>         | 0.73 (0.62-0.84)                    | 0.75 (0.61-0.90)           |
| From 2005-2008   | Sensitivity <sup>c</sup> | 62 (42-78)                          |                            |
|                  | Specificity <sup>d</sup> | 71 (71-72)                          |                            |
|                  | AUC <sup>e</sup>         | 0.67 (0.57-0.76)                    | 0.69 (0.58-0.80)           |

AUC, area under the receiver operating characteristics curve; CI, confidence interval.

a. Cut-off score based on previous research

b. 95% CI was calculated using Wilson score method

c. Proportion of true positives (suicides) correctly identified

d. Proportion of true negatives (non-suicides) correctly identified

e. A diagnostic test with an AUC value of 1.0 or 0.5 represents a perfect test or an uninformative test, respectively
