# Supplementary material for: Depressive symptoms and other risk factors predicting suicide in middle-aged men: a prospective cohort study among Korean Vietnam War veterans
Source: PubMed Central journal article supplement (PMC4493683; doi:10.7717/peerj.1071), 2015-07-02
Supplement: peerj-03-1071-s005.pdf [file peerj-03-1071-s005.pdf]

**Table S5. AUC for suicide by cut-off score of Beck Depression Inventory in Korean middle-aged men.**

| <b>BDI score cut-off</b> | <b>AUC<sup>a</sup> (95% CI)</b> | <b>BDI score cut-off</b> | <b>AUC<sup>a</sup> (95% CI)</b> |
|--------------------------|---------------------------------|--------------------------|---------------------------------|
| 5 or above               | 0.510(0.486-0.535)              | 31 or above              | 0.694(0.620-0.767)              |
| 6 or above               | 0.517(0.492-0.541)              | 32 or above              | 0.686(0.611-0.762)              |
| 7 or above               | 0.523(0.498-0.548)              | 33 or above              | 0.652(0.574-0.729)              |
| 8 or above               | 0.531(0.506-0.557)              | 34 or above              | 0.656(0.578-0.733)              |
| 9 or above               | 0.541(0.516-0.566)              | 35 or above              | 0.663(0.585-0.740)              |
| 10 or above              | 0.551(0.526-0.577)              | 36 or above              | 0.657(0.580-0.735)              |
| 11 or above              | 0.550(0.515-0.584)              | 37 or above              | 0.663(0.586-0.741)              |
| 12 or above              | 0.550(0.509-0.592)              | 38 or above              | 0.644(0.567-0.720)              |
| 13 or above              | 0.563(0.521-0.605)              | 39 or above              | 0.648(0.572-0.724)              |
| 14 or above              | 0.576(0.533-0.619)              | 40 or above              | 0.623(0.549-0.697)              |
| 15 or above              | 0.577(0.528-0.625)              | 41 or above              | 0.619(0.546-0.692)              |
| 16 or above              | 0.567(0.509-0.624)              | 42 or above              | 0.617(0.545-0.689)              |
| 17 or above              | 0.580(0.522-0.638)              | 43 or above              | 0.603(0.534-0.673)              |
| 18 or above              | 0.592(0.533-0.651)              | 44 or above              | 0.578(0.514-0.643)              |
| 19 or above              | 0.604(0.544-0.664)              | 45 or above              | 0.577(0.514-0.641)              |
| 20 or above              | 0.617(0.557-0.678)              | 46 or above              | 0.576(0.513-0.638)              |
| 21 or above              | 0.617(0.553-0.682)              | 47 or above              | 0.562(0.504-0.620)              |
| 22 or above              | 0.629(0.564-0.694)              | 48 or above              | 0.558(0.502-0.614)              |
| 23 or above              | 0.641(0.575-0.707)              | 49 or above              | 0.539(0.490-0.587)              |
| 24 or above              | 0.653(0.587-0.720)              | 50 or above              | 0.532(0.488-0.576)              |
| 25 or above              | 0.667(0.600-0.734)              | 51 or above              | 0.531(0.488-0.573)              |
| 26 or above              | 0.678(0.611-0.746)              | 52 or above              | 0.530(0.488-0.571)              |
| 27 or above              | 0.664(0.592-0.736)              | 53 or above              | 0.516(0.484-0.549)              |
| 28 or above              | 0.675(0.603-0.747)              | 54 or above              | 0.511(0.483-0.538)              |
| 29 or above              | 0.682(0.610-0.755)              | 55 or above              | 0.509(0.484-0.533)              |
| 30 or above              | 0.686(0.612-0.759)              | 56 or above              | 0.509(0.485-0.533)              |

AUC, area under the receiver operating characteristics curve; BDI, Beck Depression Inventory; CI, confidence interval.

a. A diagnostic test with an AUC value of 1.0 or 0.5 represents a perfect test or an uninformative test, respectively
