# Supplementary material for: Depressive symptoms and other risk factors predicting suicide in middle-aged men: a prospective cohort study among Korean Vietnam War veterans
Source: PubMed Central journal article supplement (PMC4493683; doi:10.7717/peerj.1071), 2015-07-02
Supplement: peerj-03-1071-s006.pdf [file peerj-03-1071-s006.pdf]

**Table S6. Hazard ratios of suicides by depressive symptoms and risk factors in Korean middle-aged men (n=10,238)<sup>a</sup> (Sensitivity analysis)<sup>b</sup>**

| Categories of risk factors           |                            | No. of suicides <sup>d</sup> | Unadjusted analysis |                 | Adjusted analysis <sup>c</sup> |                 |
|--------------------------------------|----------------------------|------------------------------|---------------------|-----------------|--------------------------------|-----------------|
|                                      |                            |                              | p-value             | HR (95% CI)     | p-value                        | HR (95% CI)     |
| Age at enrollment                    | One year increase in age   | 41                           | 0.24                | 0.9 (0.9-1.0)   | 0.30                           | 0.9 (0.8-1.1)   |
| Smoking status                       | Never smoker               | 9                            |                     | 1.0 [Reference] |                                | 1.0 [Reference] |
|                                      | Past smoker                | 7                            | 0.95                | 1.0 (0.4-2.6)   | 0.69                           | 0.8 (0.3-2.2)   |
|                                      | Current smoker             | 25                           | 0.15                | 1.8 (0.8-3.8)   | 0.40                           | 1.4 (0.6-3.1)   |
|                                      | p for trend <sup>e</sup>   | 41                           | 0.11                | 1.4 (0.9-2.0)   | 0.32                           | 1.2 (0.8-1.8)   |
| Drinking status                      | Non-drinker                | 18                           |                     | 1.0 [Reference] |                                | 1.0 [Reference] |
|                                      | Current drinker            | 23                           | 0.45                | 0.8 (0.4-1.5)   | 0.96                           | 1.0 (0.5-2.0)   |
| Body mass index (kg/m <sup>2</sup> ) | Below 23.0                 | 24                           |                     | 1.0 [Reference] |                                | 1.0 [Reference] |
|                                      | 23.0-24.9                  | 10                           | 0.18                | 0.6 (0.3-1.3)   | 0.59                           | 0.8 (0.4-1.7)   |
|                                      | 25 or above                | 7                            | 0.07                | 0. (0.2-1.0)    | 0.26                           | 0.6 (0.3-1.4)   |
|                                      | p for trend <sup>e</sup>   | 41                           | <b>0.04</b>         | 0.7 (0.4-1.0)   | 0.25                           | 0.8 (0.5-1.2)   |
| Self-rated health                    | Very good, good, or fair   | 10                           |                     | 1.0 [Reference] |                                | 1.0 [Reference] |
|                                      | Poor                       | 16                           | 0.24                | 1.6 (0.7-3.6)   | 0.70                           | 0.8 (0.3-2.1)   |
|                                      | Very poor                  | 15                           | <b>&lt;0.001</b>    | 5.8 (1.8-13.0)  | 0.21                           | 1.9 (0.7-5.3)   |
|                                      | p for trend <sup>e</sup>   | 41                           | <b>&lt;0.001</b>    | 2.5 (1.6-3.9)   | 0.15                           | 1.5 (0.9-2.6)   |
| Marital status                       | Living with spouse         | 35                           |                     | 1.0 [Reference] |                                | 1.0 [Reference] |
|                                      | Living without spouse      | 6                            | 0.09                | 2.1 (0.9-5.0)   | 0.73                           | 1.2 (0.5-2.9)   |
| Educational status                   | Elementary school or below | 16                           | <b>0.002</b>        | 3.6 (1.6-8.2)   | <b>0.045</b>                   | 2.4 (1.0-5.5)   |
|                                      | Middle school              | 15                           | <b>0.02</b>         | 2.8 (1.2-6.3)   | 0.09                           | 2.1 (0.9-4.9)   |

| Categories of risk factors                           |                          | No. of suicides <sup>d</sup> | Unadjusted analysis |                 | Adjusted analysis <sup>c</sup> |                 |
|------------------------------------------------------|--------------------------|------------------------------|---------------------|-----------------|--------------------------------|-----------------|
|                                                      |                          |                              | p-value             | HR (95% CI)     | p-value                        | HR (95% CI)     |
|                                                      | High school or above     | 10                           |                     | 1.0 [Reference] |                                | 1.0 [Reference] |
|                                                      | p for trend <sup>e</sup> | 41                           | <b>&lt;0.001</b>    | 0.6 (0.4-0.8)   | <b>0.03</b>                    | 0.7 (0.5-1.0)   |
| Household income per month (Korean Won) <sup>f</sup> | Below 1,000,000          | 21                           | <b>0.03</b>         | 3.7 (1.1-12.2)  | 0.78                           | 1.2 (0.3-4.5)   |
|                                                      | 1,000,000-1,990,000      | 16                           | 0.29                | 2.0 (0.6-6.8)   | 0.79                           | 1.2 (0.3-4.4)   |
|                                                      | 2,000,000 or more        | 4                            |                     | 1.0 [Reference] |                                | 1.0 [Reference] |
|                                                      | p for trend <sup>e</sup> | 41                           | <b>0.01</b>         | 0.5 (0.3-0.9)   | 0.85                           | 0.9 (0.5-1.7)   |
| Participant group                                    | Health exam group        | 7                            | 0.46                | 0.7 (0.3-1.7)   | 0.77                           | 0.9 (0.4-2.1)   |
|                                                      | Survey-only group        | 34                           |                     | 1.0 [Reference] |                                | 1.0 [Reference] |
| Depressive symptoms <sup>g</sup>                     | No (0-13)                | 3                            |                     | 1.0 [Reference] |                                | 1.0 [Reference] |
|                                                      | Mild (14-21)             | 6                            | 0.51                | 1.6 (0.4-6.8)   | 0.66                           | 1.4 (0.3-6.0)   |
|                                                      | Moderate (22-30)         | 5                            | 0.70                | 1.4 (0.3-6.3)   | 0.99                           | 1.0 (0.2-5.1)   |
|                                                      | Severe (31-39)           | 12                           | <b>0.009</b>        | 5.4 (1.5-19.4)  | 0.10                           | 3.4 (0.8-14.4)  |
|                                                      | Extreme (40-63)          | 15                           | <b>&lt;0.001</b>    | 10.2 (3.0-35.0) | <b>0.04</b>                    | 4.8 (1.1-21.8)  |
|                                                      | p for trend <sup>e</sup> | 41                           | <b>&lt;0.001</b>    | 1.9 (1.5-2.5)   | <b>0.009</b>                   | 1.6 (1.1-2.2)   |

BDI, Beck Depression Inventory; CI, confidence interval; HR, hazard ratio.

a. Hazard ratios were calculated using a Cox proportional hazards model over multiple imputed data

b. Classification for drinking status, body mass index, and self-rated health was different from Tables 2-3.

c. Variables included in the Cox model were age at enrollment, smoking status, drinking status, body mass index, self-rated health, marital status, educational status, household monthly income, participant group, and depressive symptoms (5 categories based on quartiles and the last decile of the total BDI score).

d. Sum of the number of suicides may not equal the total suicides (n=41) due to rounding of averages over multiple imputed data.

e. Categories of risk factors were analyzed as ordinal variables.

f. 1300 Korean Won was about one US dollar as of June, 2001

g. Cut-off score based on quartiles and the last decile
