# Supplementary material for: Depressive symptoms and other risk factors predicting suicide in middle-aged men: a prospective cohort study among Korean Vietnam War veterans
Source: PeerJ journal article supplement (doi:10.7717/peerj.1071), 2015-07-02
Supplement: Supplemental_Figure_S1.pdf [file Supplemental_Figure_S1.pdf]

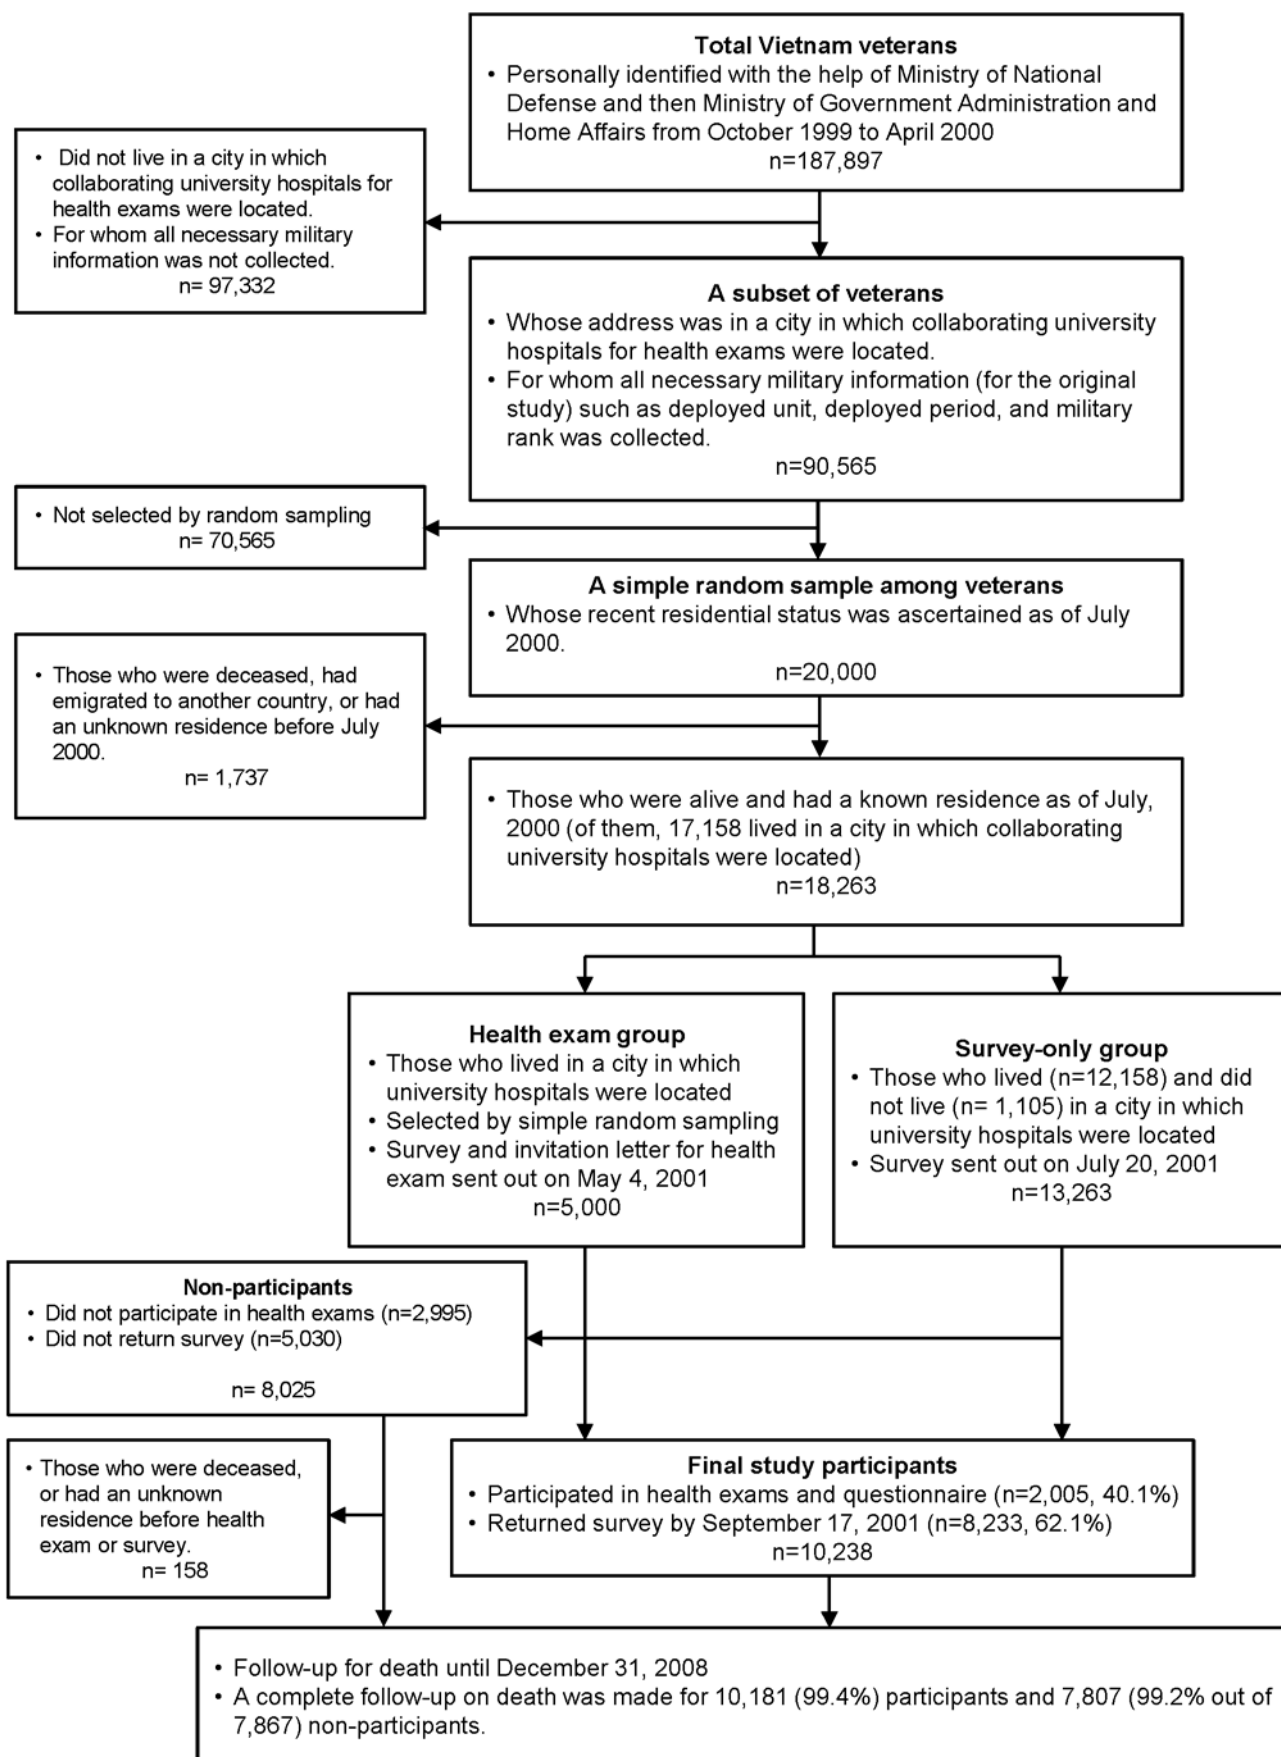

Figure S1. Flow of the study participants
